# Supplementary material for: Ultrasoft Long-Lasting Reusable Hydrogel-Based Sensor Patch for Biosignal Recording
Source: Preprints.org preprint supplement (doi:10.20944/preprints202407.1104.v1), 2024-07-15
Supplement: Supplementary file 1 [file supplementary]

Supporting Information

Ultrasoft long-lasting reusable hydrogel-based sensor patch for biosignal recording

Alex Tessier *1, Shuyun Zhuo*1, Shideh Kabiri Ameri §1,2

1Department of Electrical and Computer Engineering, Queen’s University, Kingston, ON, Canada

2Centre for Neuroscience Studies, Queen's University, Kingston, ON, Canada

§Corresponding author: shideh.ameri@queensu.ca

*Alex Tessier and Shuyun Zhuo contributed equally to this work.


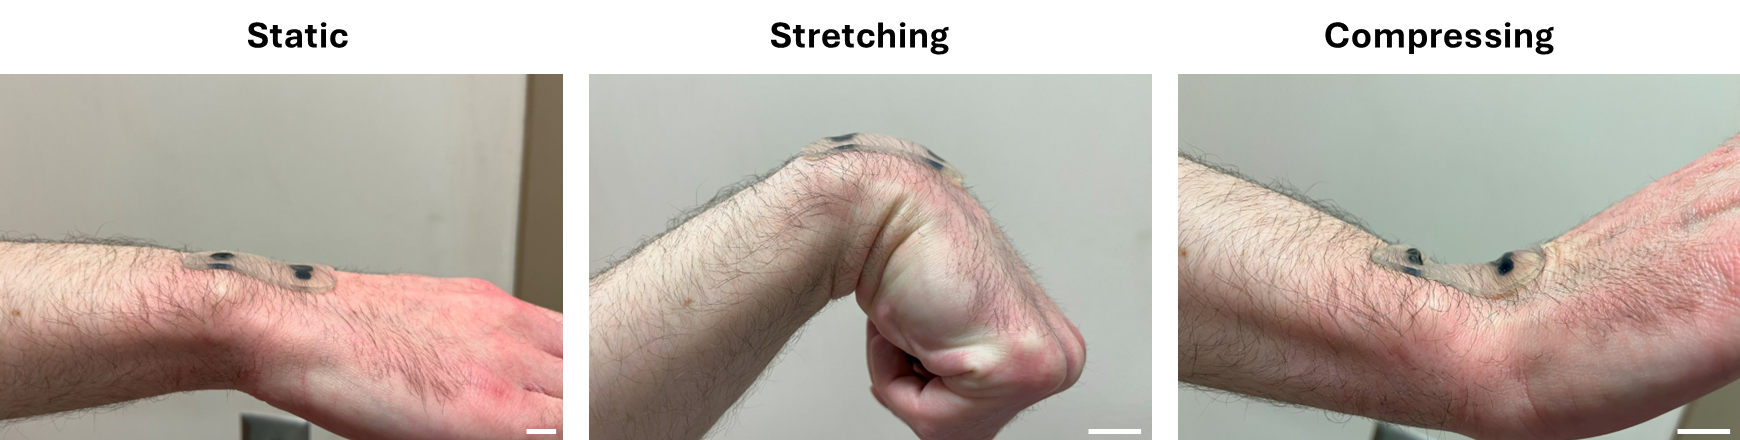


Figure S1. Hydrogel-based sensor adhered to human skin at static state and under strain and compression. Scale bar, 1 cm.


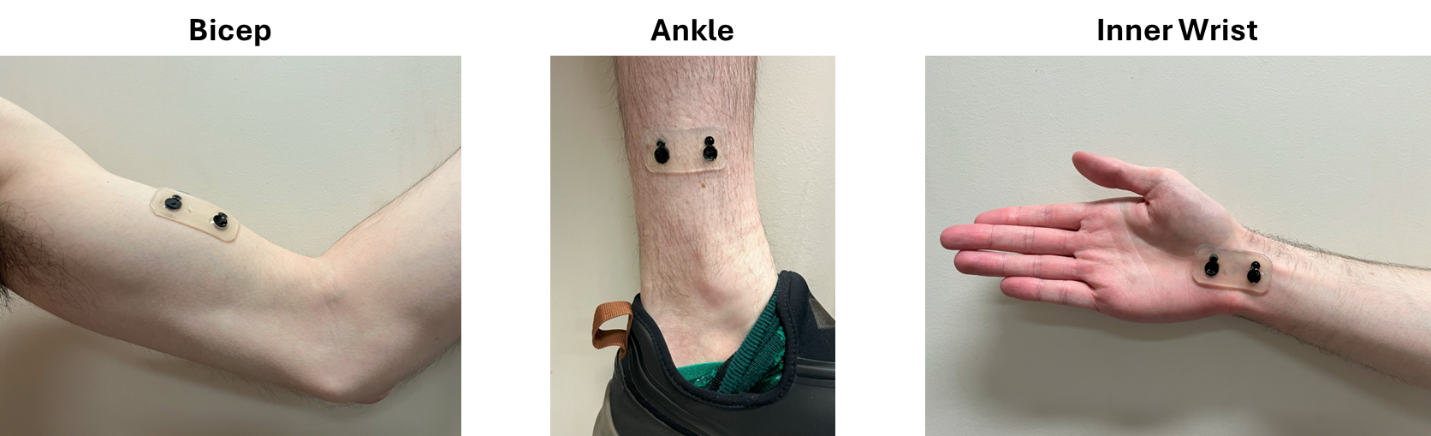


Figure S2. Hydrogel-based sensors placed on various parts of the body.


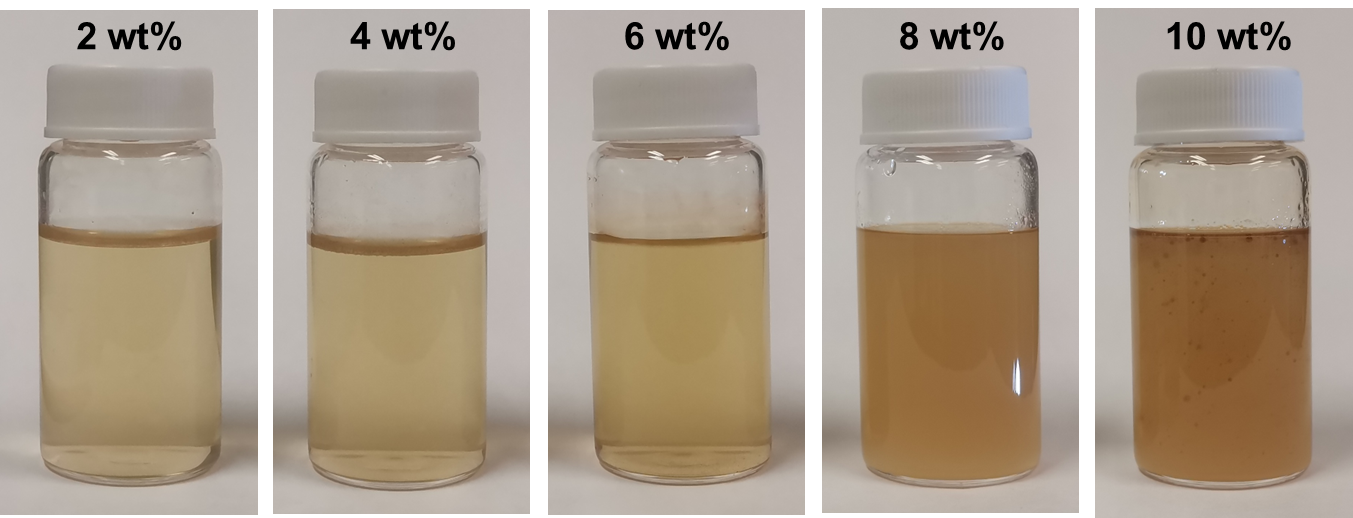


Figure S3. Photos showing the pyrrole aqueous solutions with different pyrrole contents from 2 wt% to 10 wt%.

Figure S4. Sensor-skin interface impedance of the hydrogel-based sensors with different polypyrrole contents.

Figure S5. Strain-stress curves of hydrogels with different polypyrrole contents.

Figure S6. Sensor-skin interface impedance of hydrogel-based sensors before and after exercise within the frequency range of 20-1000 Hz.


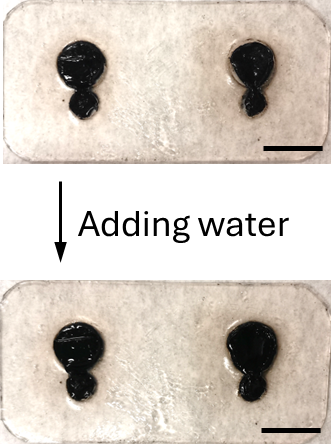


Figure S7. The photos showing a sensor after being stored for 2 months in the ambient environment, and 15 minutes after adding a drop of water on each electrode in the sensor to re-hydrate it. Scale bar is 1 cm.
